# Supplementary material
Source: publisher figshare collection journal article supplement (https://future-science-group.figshare.com/ndownloader/files/31485782)
Supplement: Supplementary file 1 [file 31485782]

## Sheet: Sheet1
Hazard ratio of FCGBP expression for the recurrence of PTC.
	HR of log FCGBP expression (95%CI)	p-value
Unadjusted	0.41 (0.11 - 1.48)	0.172
Adjusted for age and gender	0.38 (0.10 - 1.43)	0.153
adjusted for age, gender, T-stage, and lymph node metastasis	0.52 (0.11 - 2.38)	0.397
HR: Hazard Ratio; CI: Confidence Interval
